# Supplementary material for: Levofloxacin-loaded surfactant nanocarriers: a computational study
Source: Royal Society of Chemistry journal article supplement (doi:10.1039/d5na00884k), 2026-01-01

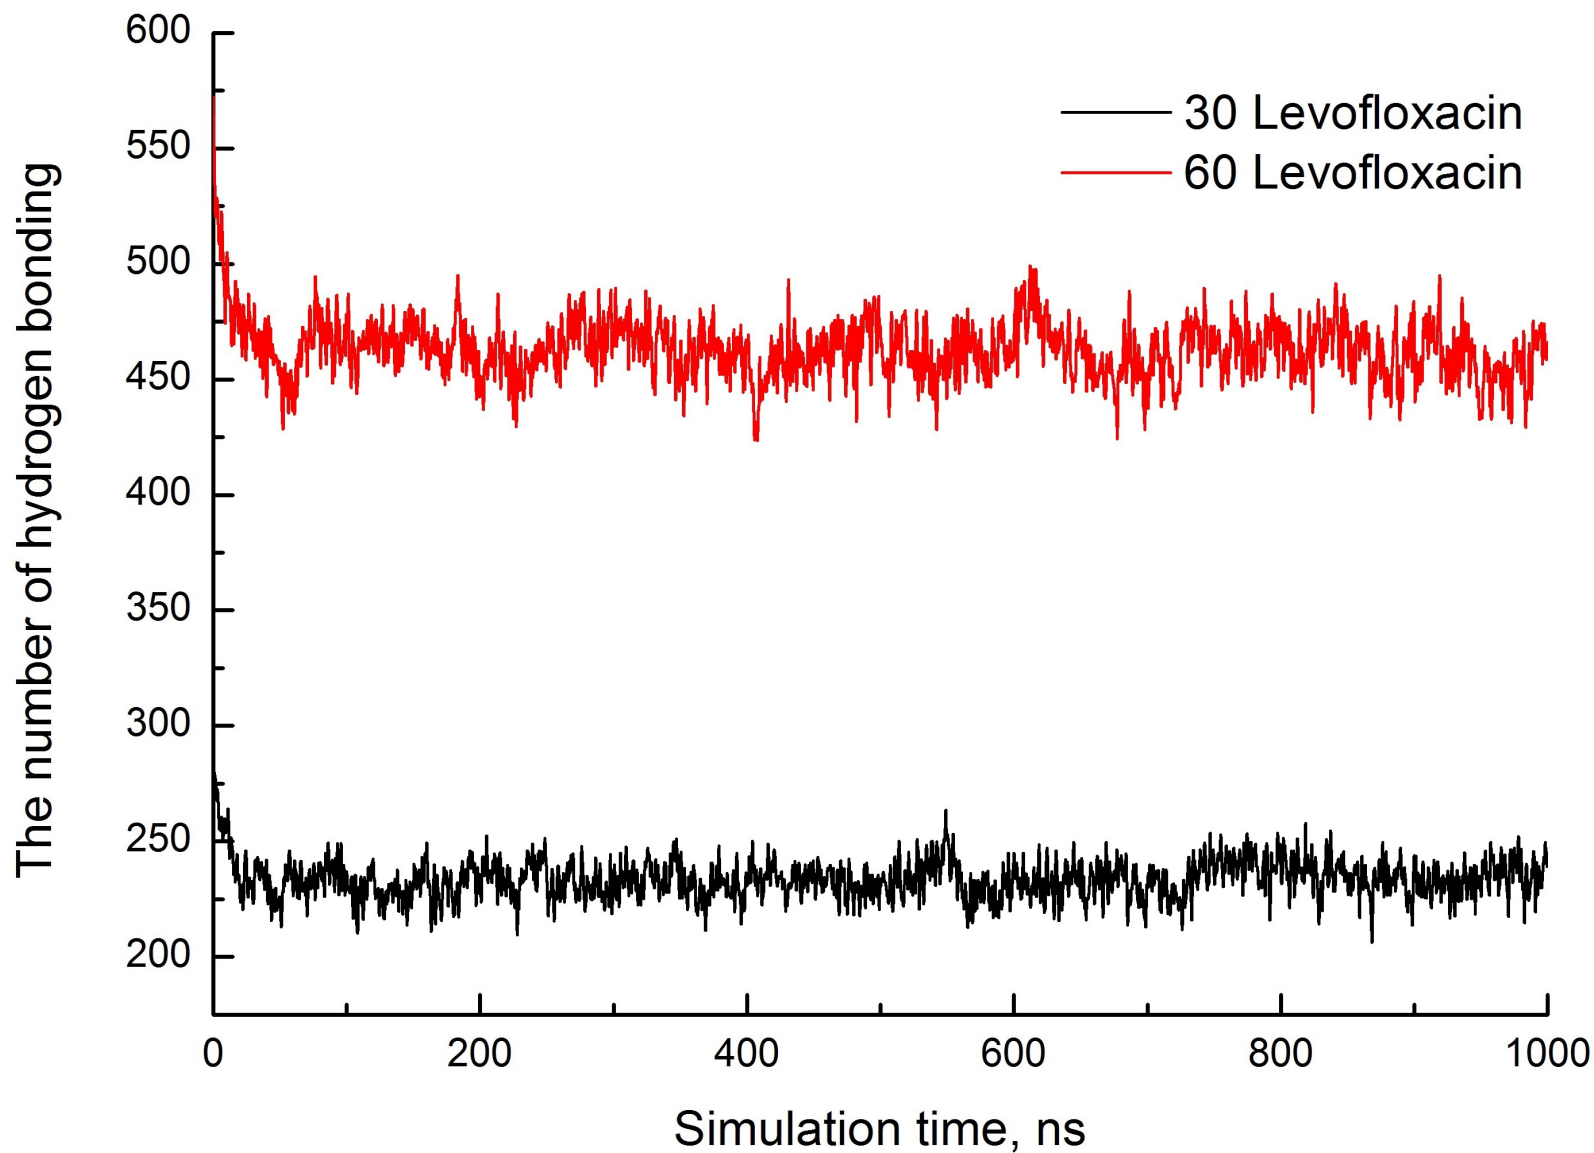

Supplement: d5na00884k1.pdf [file d5na00884k1.pdf]
